# Supplementary material
Source: PubMed Central journal article supplement (PMC3651896)
Supplement: NIHMS455374-supplement-S6.pdf [file NIHMS455374-supplement-S6.pdf]

ESM TABLE 1: *Fold changes in JAK/STAT PCR Array gene expression for INS-1 cells and  $\beta$ TC-3 cells related to IL-12 stimulation. Table page 1*

**INS-1 CELLS**

| <b>Gene</b>   | <b>Description</b>                                                                | <b>Fold Change</b> |
|---------------|-----------------------------------------------------------------------------------|--------------------|
| <b>A2m</b>    | Alpha-2-macroglobulin                                                             | 1.8                |
| <b>Aps</b>    | SH2B adaptor protein 2                                                            | 3.6                |
| <b>Bcl2l1</b> | Bcl2-like 1                                                                       | 1.9                |
| <b>Ccnd1</b>  | Cyclin D1                                                                         | 1.9                |
| <b>Cdkn1a</b> | Cyclin-dependent kinase inhibitor 1A                                              | 3.1                |
| <b>Cebpb</b>  | CCAAT/enhancer binding protein (C/EBP), beta                                      | 1.3                |
| <b>Crk</b>    | V-crk sarcoma virus CT10 oncogene homolog (avian)                                 | 1.1                |
| <b>Crp</b>    | C-reactive protein, pentraxin-related                                             | 0.6                |
| <b>Csf1r</b>  | Colony stimulating factor 1 receptor                                              | -4.0               |
| <b>Csf2rb</b> | Colony stimulating factor 2 receptor, beta, low-affinity (granulocyte-macrophage) | 1.2                |
| <b>Cxcl9</b>  | Chemokine (C-X-C motif) ligand 9                                                  | 4.0                |
| <b>Egfr</b>   | Epidermal growth factor receptor                                                  | 1.2                |
| <b>Epor</b>   | Erythropoietin receptor                                                           | 1.2                |
| <b>F2</b>     | Coagulation factor II (thrombin)                                                  | 2.9                |
| <b>F2r</b>    | Coagulation factor II (thrombin) receptor                                         | 1.1                |
| <b>Fcer1a</b> | Fc fragment of IgE, high affinity I, receptor for; alpha polypeptide              | 1.4                |
| <b>Fcgr1a</b> | Fc fragment of IgG, high affinity Ia, receptor (CD64)                             | 1.0                |
| <b>Isg15</b>  | ISG15 ubiquitin-like modifier                                                     | 1.5                |
| <b>Gata3</b>  | GATA binding protein 3                                                            | 1.7                |
| <b>Gbp1</b>   | Guanylate binding protein 1                                                       | 3.3                |
| <b>Ghr</b>    | Growth hormone receptor                                                           | 1.2                |
| <b>Hmga1</b>  | High mobility group AT-hook 1                                                     | 1.3                |
| <b>Ifnar1</b> | Interferon (alpha, beta and omega) receptor 1                                     | 1.3                |
| <b>IFNg</b>   | Interferon gamma                                                                  | 4.3                |
| <b>IFNgr</b>  | Interferon gamma receptor 1                                                       | 2.5                |
| <b>Il10ra</b> | Interleukin 10 receptor, alpha                                                    | 0.7                |
| <b>Il2ra</b>  | Interleukin 2 receptor, alpha                                                     | 1.4                |
| <b>Il2rg</b>  | Interleukin 2 receptor, gamma                                                     | 0.7                |
| <b>Il4</b>    | Interleukin 4                                                                     | 1.6                |
| <b>Il4ra</b>  | Interleukin 4 receptor, alpha                                                     | 1.4                |
| <b>Il6st</b>  | Interleukin 6 signal transducer                                                   | 1.4                |
| <b>Irf1</b>   | Interferon regulatory factor 1                                                    | 1.2                |
| <b>Irf9</b>   | Interferon regulatory factor 9                                                    | N/A                |
| <b>Jak1</b>   | Janus kinase 1                                                                    | 1.5                |
| <b>Jak2</b>   | Janus kinase 2                                                                    | 1.4                |
| <b>Jak3</b>   | Janus kinase 3                                                                    | 1.3                |

ESM TABLE 1: *Fold changes in JAK/STAT PCR Array gene expression for INS-1 cells and  $\beta$ TC-3 cells related to IL-12 stimulation. Table page 2*

|               |                                                                      |            |
|---------------|----------------------------------------------------------------------|------------|
| <b>Jun</b>    | Jun oncogene                                                         | <b>1.0</b> |
| <b>Junb</b>   | Jun B proto-oncogene                                                 | <b>1.1</b> |
| <b>Sit1</b>   | Signaling threshold regulating transmembrane adaptor 1               | <b>1.3</b> |
| <b>Il20</b>   | Interleukin 20                                                       | <b>1.5</b> |
| <b>Mmp3</b>   | Matrix metalloproteinase 3                                           | <b>1.1</b> |
| <b>Mpl</b>    | Myeloproliferative leukemia virus oncogene                           | <b>0.6</b> |
| <b>Myc</b>    | Myelocytomatosis oncogene                                            | <b>1.1</b> |
| <b>Nfkb1</b>  | Nuclear factor of kappa light polypeptide gene enhancer in B-cells 1 | <b>1.5</b> |
| <b>Nos2</b>   | Nitric oxide synthase 2, inducible                                   | <b>1.4</b> |
| <b>Nr3c1</b>  | Nuclear receptor subfamily 3, group C, member 1                      | <b>1.4</b> |
| <b>Osm</b>    | Oncostatin M                                                         | <b>2.1</b> |
| <b>Pdgfra</b> | Platelet derived growth factor receptor, alpha polypeptide           | <b>1.0</b> |
| <b>Pias1</b>  | Protein inhibitor of activated STAT, 1                               | <b>1.2</b> |
| <b>Prl</b>    | Prolactin                                                            | <b>1.3</b> |
| <b>Prlr</b>   | Prolactin receptor                                                   | <b>1.1</b> |
| <b>Ptpn1</b>  | Protein tyrosine phosphatase, non-receptor type 1                    | <b>1.2</b> |
| <b>Sirpa</b>  | Signal-regulatory protein alpha                                      | <b>1.1</b> |
| <b>Ptprc</b>  | Protein tyrosine phosphatase, receptor type, C                       | <b>1.6</b> |
| <b>Pzp</b>    | Pregnancy-zone protein                                               | <b>1.0</b> |
| <b>Il10rb</b> | Interleukin 10 receptor, beta                                        | <b>1.3</b> |
| <b>Sla2</b>   | Src-like-adaptor 2                                                   | <b>1.1</b> |
| <b>Stam</b>   | Signal transducing adaptor molecule (SH3 domain and ITAM motif) 1    | <b>1.8</b> |
| <b>Socs5</b>  | Suppressor of cytokine signaling 5                                   | <b>1.5</b> |
| <b>Spi1</b>   | Spleen focus forming virus (SFFV) proviral integration oncogene spi1 | <b>1.2</b> |
| <b>Sh2b1</b>  | SH2B adaptor protein 1                                               | <b>1.5</b> |
| <b>Smad1</b>  | SMAD family member 1                                                 | <b>1.4</b> |
| <b>Smad2</b>  | SMAD family member 2                                                 | <b>1.1</b> |
| <b>Smad3</b>  | SMAD family member 3                                                 | <b>1.3</b> |
| <b>Smad4</b>  | SMAD family member 4                                                 | <b>1.1</b> |
| <b>Smad5</b>  | SMAD family member 5                                                 | <b>1.2</b> |
| <b>Socs1</b>  | Suppressor of cytokine signaling 1                                   | <b>1.4</b> |
| <b>Socs2</b>  | Suppressor of cytokine signaling 2                                   | <b>3.1</b> |
| <b>Socs3</b>  | Suppressor of cytokine signaling 3                                   | <b>1.1</b> |
| <b>Socs4</b>  | Suppressor of cytokine signaling 4                                   | <b>1.2</b> |
| <b>Sp1</b>    | Sp1 transcription factor                                             | <b>1.0</b> |
| <b>Src</b>    | V-src sarcoma (Schmidt-Ruppin A-2) viral oncogene homolog (avian)    | <b>1.3</b> |
| <b>Stat1</b>  | Signal transducer and activator of transcription 1                   | <b>1.4</b> |
| <b>Stat2</b>  | Signal transducer and activator of transcription 2                   | <b>1.6</b> |
| <b>Stat3</b>  | Signal transducer and activator of transcription 3                   | <b>1.3</b> |
| <b>Stat4</b>  | Signal transducer and activator of transcription 4                   | <b>1.4</b> |
| <b>Stat5a</b> | Signal transducer and activator of transcription 5A                  | <b>1.6</b> |

ESM TABLE 1: *Fold changes in JAK/STAT PCR Array gene expression for INS-1 cells and  $\beta$ TC-3 cells related to IL-12 stimulation. Table page 3*

|               |                                                     |            |
|---------------|-----------------------------------------------------|------------|
| <b>Stat5b</b> | Signal transducer and activator of transcription 5B | <b>1.2</b> |
| <b>Stat6</b>  | Signal transducer and activator of transcription 6  | <b>1.1</b> |
| <b>Stub1</b>  | STIP1 homology and U-Box containing protein 1       | <b>1.3</b> |
| <b>Fas</b>    | Fas (TNF receptor superfamily, member 6)            | <b>1.4</b> |
| <b>Tyk2</b>   | Tyrosine kinase 2                                   | <b>1.5</b> |
| <b>Usf1</b>   | Upstream transcription factor 1                     | <b>1.5</b> |
| <b>Yy1</b>    | YY1 transcription factor                            | <b>1.1</b> |
| <b>Rplp1</b>  | Ribosomal protein, large, P1                        | <b>1.1</b> |
| <b>Hprt1</b>  | Hypoxanthine phosphoribosyltransferase 1            | <b>0.9</b> |
| <b>Rpl13a</b> | Ribosomal protein L13A                              | <b>1.4</b> |
| <b>Ldha</b>   | Lactate dehydrogenase A                             | <b>1.0</b> |

ESM TABLE 1: *Fold changes in JAK/STAT PCR Array gene expression for INS-1 cells and  $\beta$ TC-3 cells related to IL-12 stimulation. Table page 4*

$\beta$ TC-3

| Gene           | Description                                                                         | Fold Diff   |
|----------------|-------------------------------------------------------------------------------------|-------------|
| <b>A2m</b>     | Alpha-2-macroglobulin                                                               | 0.5         |
| <b>Sh2b2</b>   | SH2B adaptor protein 2                                                              | 0.9         |
| <b>Bcl2l1</b>  | Bcl2-like 1                                                                         | 0.8         |
| <b>Ccnd1</b>   | Cyclin D1                                                                           | 0.7         |
| <b>Cdkn1a</b>  | Cyclin-dependent kinase inhibitor 1A (P21)                                          | 0.9         |
| <b>Cebpb</b>   | CCAAT/enhancer binding protein (C/EBP), beta                                        | 0.9         |
| <b>Crk</b>     | V-crk sarcoma virus CT10 oncogene homolog (avian)                                   | 0.9         |
| <b>Crp</b>     | C-reactive protein, pentraxin-related                                               | 0.7         |
| <b>Csf1r</b>   | Colony stimulating factor 1 receptor                                                | 0.5         |
| <b>Csf2rb2</b> | Colony stimulating factor 2 receptor, beta 2, low-affinity (granulocyte-macrophage) | 0.3         |
| <b>Cxcl9</b>   | Chemokine (C-X-C motif) ligand 9                                                    | 0.5         |
| <b>Egfr</b>    | Epidermal growth factor receptor                                                    | 0.8         |
| <b>Epor</b>    | Erythropoietin receptor                                                             | 1.0         |
| <b>F2</b>      | Coagulation factor II                                                               | 0.8         |
| <b>F2r</b>     | Coagulation factor II (thrombin) receptor                                           | 0.8         |
| <b>Fas</b>     | Fas (TNF receptor superfamily member 6)                                             | 0.6         |
| <b>Fcer1a</b>  | Fc receptor, IgE, high affinity I, alpha polypeptide                                | 0.6         |
| <b>Fcgr1</b>   | Fc receptor, IgG, high affinity I                                                   | 0.6         |
| <b>Isg15</b>   | ISG15 ubiquitin-like modifier                                                       | 1.0         |
| <b>Gata3</b>   | GATA binding protein 3                                                              | 0.5         |
| <b>Gbp1</b>    | Guanylate binding protein 1                                                         | 0.7         |
| <b>Ghr</b>     | Growth hormone receptor                                                             | 0.9         |
| <b>Hmga1</b>   | High mobility group AT-hook 1                                                       | 1.0         |
| <b>Ifnar1</b>  | Interferon (alpha and beta) receptor 1                                              | 0.9         |
| <b>Ifng</b>    | Interferon gamma                                                                    | <b>21.3</b> |
| <b>Ifngr1</b>  | Interferon gamma receptor 1                                                         | 0.9         |
| <b>Il10ra</b>  | Interleukin 10 receptor, alpha                                                      | <b>0.1</b>  |
| <b>Il10rb</b>  | Interleukin 10 receptor, beta                                                       | 1.0         |
| <b>Il20</b>    | Interleukin 20                                                                      | 0.4         |
| <b>Il2ra</b>   | Interleukin 2 receptor, alpha chain                                                 | 0.4         |
| <b>Il2rg</b>   | Interleukin 2 receptor, gamma chain                                                 | 1.0         |
| <b>Il4</b>     | Interleukin 4                                                                       | 0.5         |
| <b>Il4ra</b>   | Interleukin 4 receptor, alpha                                                       | 1.0         |
| <b>Il6st</b>   | Interleukin 6 signal transducer                                                     | 0.7         |
| <b>Irf1</b>    | Interferon regulatory factor 1                                                      | 0.7         |
| <b>Irf9</b>    | Interferon regulatory factor 9                                                      | 0.9         |

ESM TABLE 1: *Fold changes in JAK/STAT PCR Array gene expression for INS-1 cells and  $\beta$ TTC-3 cells related to IL-12 stimulation. Table page 5*

|               |                                                                            |     |
|---------------|----------------------------------------------------------------------------|-----|
| <b>Jak1</b>   | Janus kinase 1                                                             | 0.8 |
| <b>Jak2</b>   | Janus kinase 2                                                             | 1.0 |
| <b>Jun</b>    | Jun oncogene                                                               | 1.1 |
| <b>Junb</b>   | Jun-B oncogene                                                             | 1.0 |
| <b>Mmp3</b>   | Matrix metalloproteinase 3                                                 | 0.3 |
| <b>Mpl</b>    | Myeloproliferative leukemia virus oncogene                                 | 0.6 |
| <b>Myc</b>    | Myelocytomatosis oncogene                                                  | 1.0 |
| <b>Nfkb1</b>  | Nuclear factor of kappa light polypeptide gene enhancer in B-cells 1, p105 | 0.8 |
| <b>Nos2</b>   | Nitric oxide synthase 2, inducible                                         | 0.3 |
| <b>Nr3c1</b>  | Nuclear receptor subfamily 3, group C, member 1                            | 0.9 |
| <b>Oas1a</b>  | 2'-5' oligoadenylate synthetase 1A                                         | 0.8 |
| <b>Osm</b>    | Oncostatin M                                                               | 1.0 |
| <b>Pdgfra</b> | Platelet derived growth factor receptor, alpha polypeptide                 | 0.5 |
| <b>Pias1</b>  | Protein inhibitor of activated STAT 1                                      | 0.9 |
| <b>Prl</b>    | Prolactin                                                                  | 0.4 |
| <b>Prlr</b>   | Prolactin receptor                                                         | 0.8 |
| <b>Ptpn1</b>  | Protein tyrosine phosphatase, non-receptor type 1                          | 1.1 |
| <b>Ptprc</b>  | Protein tyrosine phosphatase, receptor type, C                             | 0.6 |
| <b>Pzp</b>    | Pregnancy zone protein                                                     | 0.5 |
| <b>Saa3</b>   | Serum amyloid A 3                                                          | 0.8 |
| <b>Sfpi1</b>  | SFFV proviral integration 1                                                | 1.0 |
| <b>Sh2b1</b>  | SH2B adaptor protein 1                                                     | 0.8 |
| <b>Sit1</b>   | Suppression inducing transmembrane adaptor 1                               | 0.4 |
| <b>Sla2</b>   | Src-like-adaptor 2                                                         | 0.7 |
| <b>Smad1</b>  | MAD homolog 1 (Drosophila)                                                 | 0.8 |
| <b>Smad2</b>  | MAD homolog 2 (Drosophila)                                                 | 0.8 |
| <b>Smad3</b>  | MAD homolog 3 (Drosophila)                                                 | 0.8 |
| <b>Smad4</b>  | MAD homolog 4 (Drosophila)                                                 | 0.9 |
| <b>Smad5</b>  | MAD homolog 5 (Drosophila)                                                 | 0.6 |
| <b>Socs1</b>  | Suppressor of cytokine signaling 1                                         | 1.0 |
| <b>Socs2</b>  | Suppressor of cytokine signaling 2                                         | 0.9 |
| <b>Socs3</b>  | Suppressor of cytokine signaling 3                                         | 1.0 |
| <b>Socs4</b>  | Suppressor of cytokine signaling 4                                         | 0.9 |
| <b>Socs5</b>  | Suppressor of cytokine signaling 5                                         | 0.9 |
| <b>Sp1</b>    | Trans-acting transcription factor 1                                        | 0.8 |
| <b>Src</b>    | Rous sarcoma oncogene                                                      | 0.8 |
| <b>Stam</b>   | Signal transducing adaptor molecule (SH3 domain and ITAM motif) 1          | 0.9 |
| <b>Stat1</b>  | Signal transducer and activator of transcription 1                         | 0.9 |
| <b>Stat2</b>  | Signal transducer and activator of transcription 2                         | 0.6 |
| <b>Stat3</b>  | Signal transducer and activator of transcription 3                         | 0.9 |
| <b>Stat4</b>  | Signal transducer and activator of transcription 4                         | 0.6 |

ESM TABLE 1: *Fold changes in JAK/STAT PCR Array gene expression for INS-1 cells and  $\beta$ TC-3 cells related to IL-12 stimulation. Table page 6*

|                 |                                                           |     |
|-----------------|-----------------------------------------------------------|-----|
| <b>Stat5a</b>   | Signal transducer and activator of transcription 5A       | 0.9 |
| <b>Stat5b</b>   | Signal transducer and activator of transcription 5B       | 0.9 |
| <b>Stat6</b>    | Signal transducer and activator of transcription 6        | 1.0 |
| <b>Stub1</b>    | STIP1 homology and U-Box containing protein 1             | 0.9 |
| <b>Tyk2</b>     | Tyrosine kinase 2                                         | 0.7 |
| <b>Usf1</b>     | Upstream transcription factor 1                           | 0.9 |
| <b>Yy1</b>      | YY1 transcription factor                                  | 0.8 |
| <b>Gusb</b>     | Glucuronidase, beta                                       | 0.7 |
| <b>Hprt</b>     | Hypoxanthine guanine phosphoribosyl transferase           | 0.9 |
| <b>Hsp90ab1</b> | Heat shock protein 90 alpha (cytosolic), class B member 1 | 0.8 |
