# Supplementary material
Source: PubMed Central journal article supplement (PMC3651896)

ESM Fig. 1

A

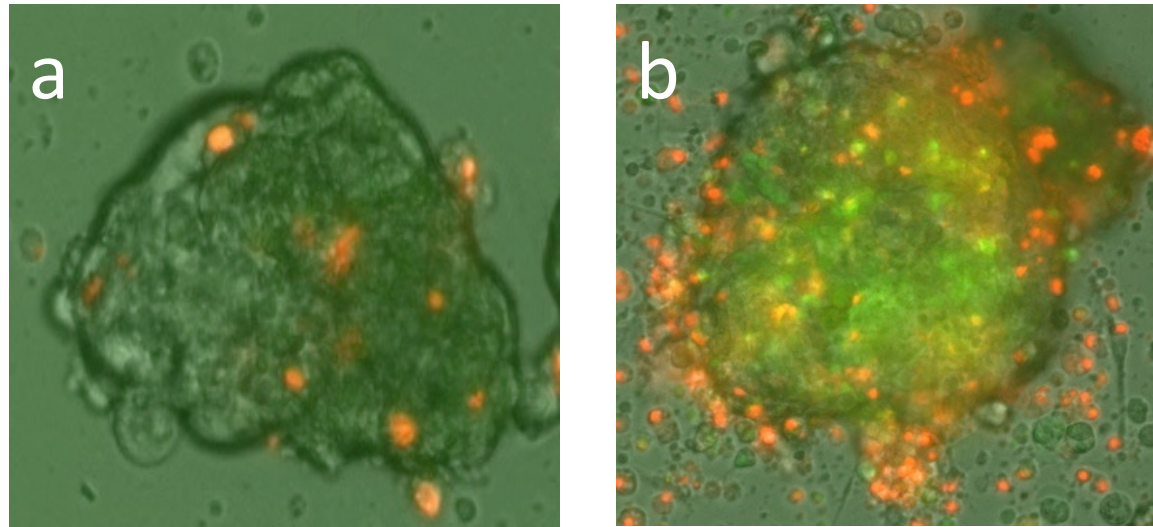

B

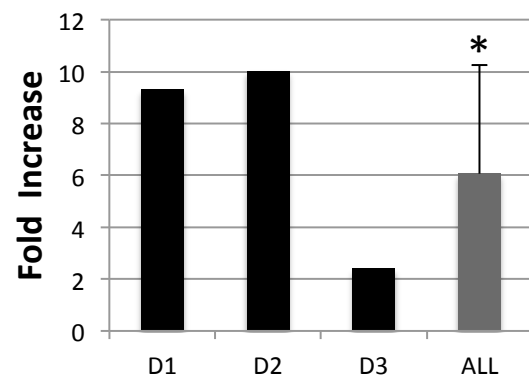

C

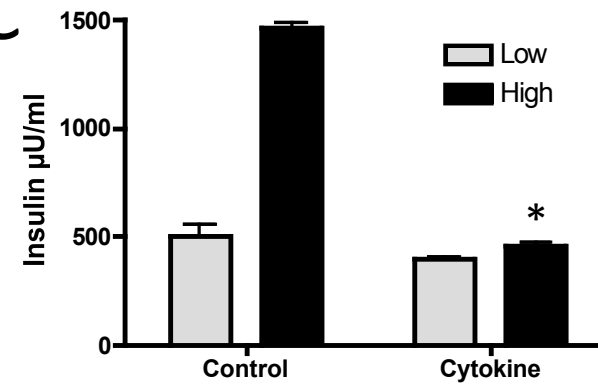

Supplement: NIHMS455374-supplement-S1.pdf [file NIHMS455374-supplement-S1.pdf]

ESM Fig. 5

**A**

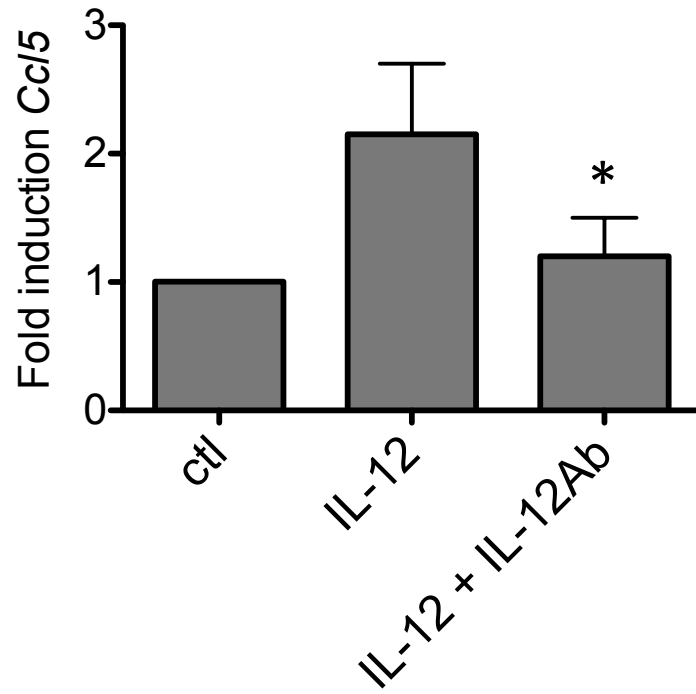

**B**

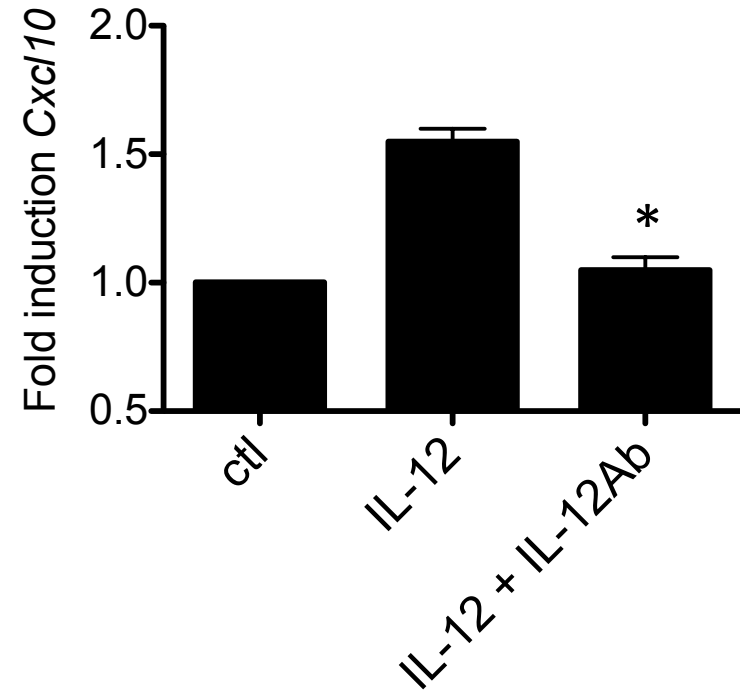

Supplement: NIHMS455374-supplement-S5.pdf [file NIHMS455374-supplement-S5.pdf]
